# Supplementary material for: Relatively homogeneous network structures of temperature-responsive gels synthesized via atom transfer radical polymerization
Source: Royal Society of Chemistry journal article supplement (doi:10.1039/d3sm00044c), 2023-01-01
Supplement: d3sm00044c1.pdf [file d3sm00044c1.pdf]

## Supplementary Information (SI)

# Relatively homogeneous network structures of temperature-responsive gels synthesized *via* atom transfer radical polymerization

Chisa Norioka,<sup>a</sup> Akifumi Kawamura<sup>a, b</sup> and Takashi Miyata<sup>\*a, b</sup>

<sup>a</sup> Department of Chemistry and Materials Engineering, Kansai University, 3-3-35, Yamate-cho, Suita, Osaka 564-8680, Japan

<sup>b</sup> Organization for Research and Development of Innovative Science and Technology, Kansai University, 3-3-35, Yamate-cho, Suita, Osaka 564-8680, Japan

\*Correspondence to:

Takashi Miyata E-mail: [tmiyata@kansai-u.ac.jp](mailto:tmiyata@kansai-u.ac.jp)

**Table S1.** Composition of monomer, cross-linker and initiators in the feed for preparing ATRP gels.

| MBAA content (mol%) | In feed solution (monomer solution) |       |       |       |         |       |                   |       |       |
|---------------------|-------------------------------------|-------|-------|-------|---------|-------|-------------------|-------|-------|
|                     | NIPAAm                              |       | MBAA  |       | 2-CI-PA |       | CuCl <sub>2</sub> |       | Water |
|                     | (mg)                                | (mol) | (mg)  | (mol) | (mg)    | (mol) | (mg)              | (mol) | mL    |
| 0.5                 | 452.9                               | 4.00  | 3.41  | 0.022 | 1.08    | 0.01  | 0.008             | 1.08  | 3     |
| 1                   |                                     |       | 6.81  | 0.044 |         |       |                   |       |       |
| 3                   |                                     |       | 20.45 | 0.13  |         |       |                   |       |       |
| 5                   |                                     |       | 31.54 | 0.20  |         |       |                   |       |       |
| 10                  |                                     |       | 63.51 | 0.41  |         |       |                   |       |       |
| 13                  |                                     |       | 82.31 | 0.53  |         |       |                   |       |       |

**Table S2.** Composition of monomer, cross-linker and initiators in the feed for preparing FRP gels.

| MBAA content (mol%) | In feed solution (monomer solution) |       |       |       |       |       |      |       |       |
|---------------------|-------------------------------------|-------|-------|-------|-------|-------|------|-------|-------|
|                     | NIPAAm                              |       | MBAA  |       | TEMED |       | APS  |       | Water |
|                     | (mg)                                | (mol) | (mg)  | (mol) | (mg)  | (mol) | (mg) | (mol) | (mL)  |
| 0.05                | 452.93                              | 4     | 0.34  | 0.002 | 11.8  | 0.08  | 2.26 | 0.01  | 3.0   |
| 0.1                 |                                     |       | 0.68  | 0.004 |       |       |      |       |       |
| 0.5                 |                                     |       | 3.41  | 0.022 |       |       |      |       |       |
| 1                   |                                     |       | 6.78  | 0.044 |       |       |      |       |       |
| 3                   |                                     |       | 20.35 | 0.132 |       |       |      |       |       |
| 5                   |                                     |       | 31.84 | 0.207 |       |       |      |       |       |
| 10                  |                                     |       | 63.1  | 0.409 |       |       |      |       |       |
| 13                  |                                     |       | 82.28 | 0.533 |       |       |      |       |       |

**Table S3.** Compression moduli of as-prepared and swollen ATRP and FRP gels with various cross-linker contents.

| MBAA content (mol%) | Compression modulus (kPa) |         |             |         |
|---------------------|---------------------------|---------|-------------|---------|
|                     | ATRP gel                  |         | FRP gel     |         |
|                     | as-prepared               | swollen | as-prepared | swollen |
| 0.05                | —                         | —       | 2.3         | 1.5     |
| 0.1                 | —                         | —       | 3.7         | 2.4     |
| 0.5                 | 0.8                       | 0.8     | 10.2        | 7.5     |
| 1                   | 5.7                       | 5.7     | 16.1        | 10.1    |
| 3                   | 31.7                      | 35.3    | 54.4        | 46.6    |
| 5                   | 55.0                      | 62.0    | 84.1        | 56.7    |
| 10                  | 88.9                      | 94.8    | 84.5        | 63.5    |
| 13                  | 103.6                     | 107.7   | 86.7        | 62.2    |

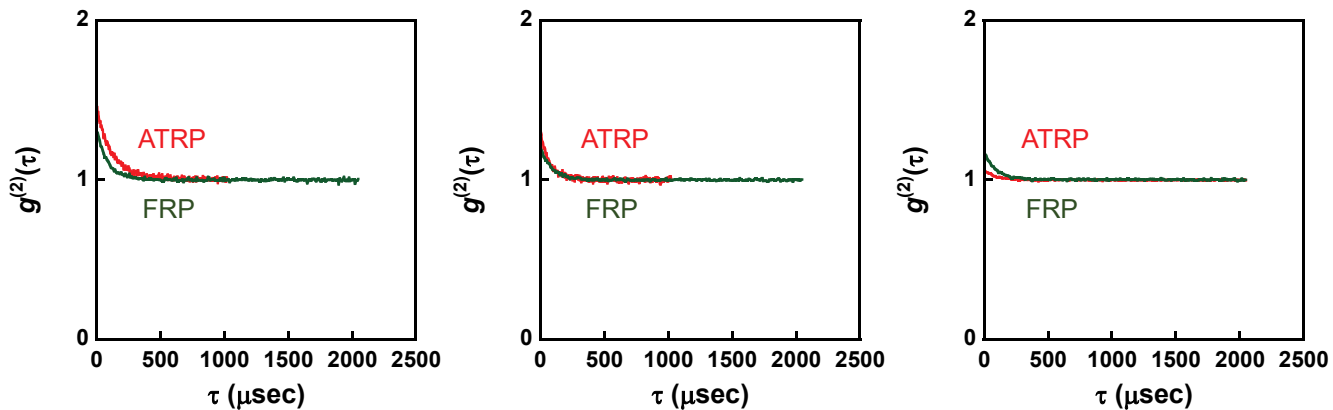

**Fig. S1.** Examples of intensity correlation function profiles for the ATRP gel (—) and FRP gel (—) at an arbitrary position. Their cross-linker contents were (a) 1, (b) 3 and (c) 5 mol%. The DLS measurements were performed at 25 °C.

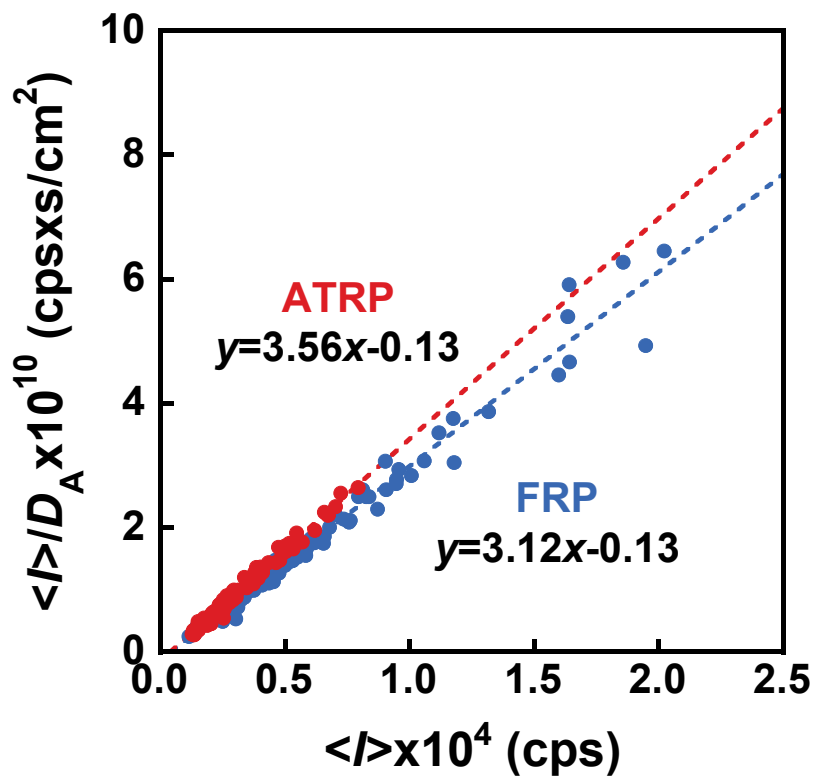

**Fig. S2.** Decomposition plots for PNIPAAm gels synthesized *via* ATRP (●) and FRP (●) at 5 °C. Their cross-linker content was 3mol%. The DLS measurements were performed at 25 °C.

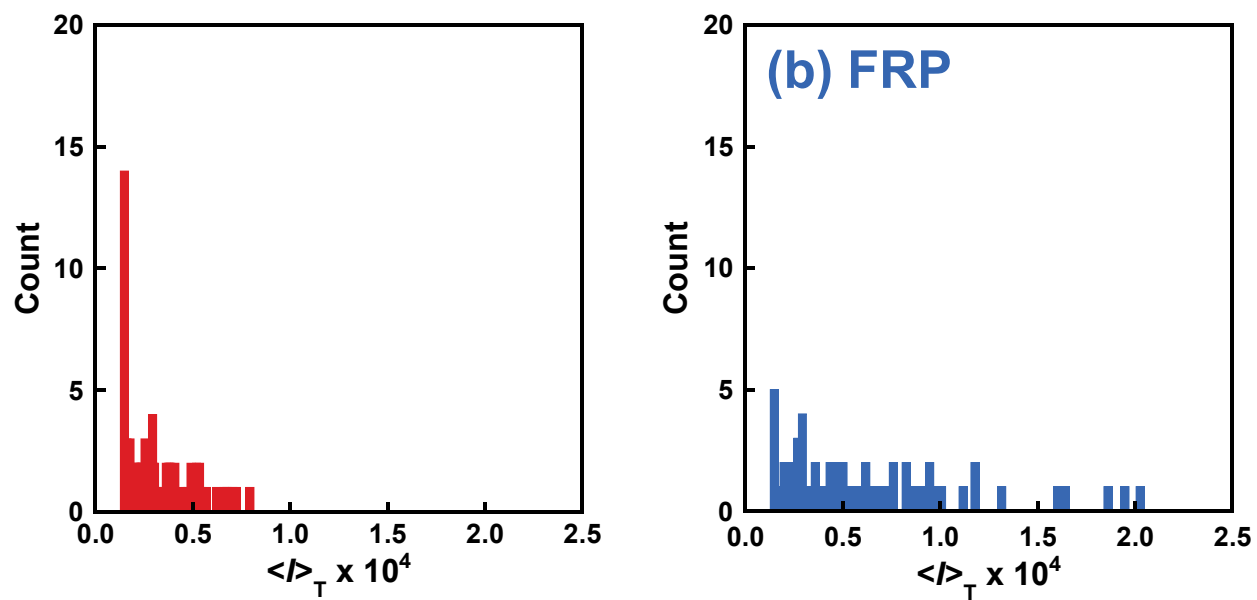

**Fig. S3.** Histograms of the scattered intensity,  $\langle I \rangle_T$ , for PNIPAAm gels synthesized *via* ATRP (a) and FRP (b) with a cross-linker content of 3mol% at 5 °C. The DLS measurements were performed at 25 °C.
